# Supplementary material for: Age differences in using humor to cope during a pandemic
Source: publisher site journal article supplement (doi:10.1515/humor-2021-0137), 2023-02-01
Supplement: Supplementary file 1 [file j_humor-2021-0137_suppl.docx]

Supplemental Material: *Interrelationships Within Age Groups*

| Variable | 1. | 2. | 3. | *M* | *SD* | *α* |
| --- | --- | --- | --- | --- | --- | --- |
| 1. Coping Humor | – | .42** | -.02 | 17.39 | 3.46 | .78 |
| 2. Pandemic-Related Humor | .38** | – | -.02 | 3.37 | .81 | .69 |
| 3. State Anxiety | -.27** | -.10 | – | 2.41 | .62 | .94 |
| *M* | 17.87 | 3.02 | 1.69 |  |  |  |
| *SD* | 3.48 | .96 | .55 |  |  |  |
| *α* | .80 | .81 | .94 |  |  |  |

*Note.* The correlation coefficients above the diagonal are for the younger groups and those shown below are for the older group. Additionally means, standard deviations, and reliability indices for the younger groups are listed on the vertical columns, and the respective descriptive information for the older group are listed on the bottom rows.

** p* < *.05,* ***p* < .01
